# Supplementary material for: The effect of a plant-based pediatric nutrition drink based on almonds and buckwheat on reported relief of intolerance symptoms: retrospective analysis of a parent survey
Source: Research Square preprint supplement (doi:10.21203/rs.3.rs-3681301/v1), 2023-12-06
Supplement: Supplementary file 1 [file 028f29923aeaef1b6ed369ab.docx]

Table S1: Nutritional facts of the END commercially available products

| Nutrition Facts  per serving | Unit | ELSE Nutritional Drink for Toddlers (36g) | ELSE Nutritional Drink for Kids VANILLA (45g) |
| --- | --- | --- | --- |
| Energy | Kcal | 180 | 210 |
| Total Lipids | g | 9 | 8 |
| Saturated Fatty Acids | g | 1 | 1 |
| Cholesterol | mg | 0 | 0 |
| Sodium | mg | 60 | 75 |
| Total Carbohydrates | g | 20 | 28 |
| Sugar | g | 3 | 4 |
| Fibers | g | 2 | 1 |
| Protein | g | 5 | 5 |
| Vitamin A | mcg-RAE | 237 | 400 |
| Vitamin D | mcg | 4 | 7 |
| Vitamin E | mg | 7 | 4 |
| Vitamin K | mcg | 18 |  |
| Thiamine | mg | 0.3 | 0.5 |
| Riboflavin | mg | 0.4 | 0.6 |
| Niacin | mg NE | 1.5 | 2 |
| Vitamin B6 | mg | 0.1 | 0.2 |
| Folate | mcg DFE | 40 | 42 |
| Vitamin B12 | mcg | 0.4 | 1 |
| Vitamin C | mg | 5 | 7 |
| Biotin | mcg | 7.3 | 11 |
| Pantothenic Acid | mg | 2 | 3 |
| Calcium | mg | 240 | 280 |
| Phosphorus | mg | 193 | 210 |
| Magnesium | mg | 66 | 65 |
| Iodine | mcg | 54 | 76 |
| Iron | mg | 4 | 6 |
| Zinc | mg | 2.7 | 4 |
| Potassium | mg | 320 | 360 |
| Choline | mg | 50 | 70 |
| Manganese | mg | 0.4 | 0.5 |
| Copper | mg | 0.2 | 0.2 |
